# Supplementary material for: Intratumor heterogeneity and cell secretome promote chemotherapy resistance and progression of colorectal cancer
Source: PubMed Central journal article supplement (PMC10160076; doi:10.1038/s41419-023-05806-z), 2023-05-05
Supplement: 41419_2023_5806_MOESM1_ESM.pdf [file 41419_2023_5806_MOESM1_ESM.pdf]

**Table S1 IC<sub>50</sub> of colorectal cancer cell lines to 5-FU**

Colorectal cancer (CRC) cell lines were treated with different concentrations of 5-FU and cell viability was measured using MTS assays. The average and the standard deviation were calculated using cells from 3 different passages (n=3). Statistical significance was calculated using a two-tailed Student's t-test. P-values of less than 0.05 and 0.01 were considered significant (\*) and highly significant (\*\*), respectively.

| <b>Cell line</b> | <b>IC<sub>50</sub> (μM) of 72 h</b> |
|------------------|-------------------------------------|
| HCT116           | 3.83 ± 0.76                         |
| LoVo             | 18.85 ± 3.65                        |
| MDST8            | 8.53 ± 1.60                         |
| SW620            | 124.68 ± 27.09                      |

**Table S3. Pathway analysis on down-regulated metabolites in DMSO vehicle treated conditioned media (CM\_Vehicle) of HCT116 compared to control media without cells (Control).**

The Total is the total number of compounds in the pathway; the Hits is the actually matched number from the user uploaded data; the Raw p is the original p value calculated from the enrichment analysis; the Holm p is the p value adjusted by Holm-Bonferroni method; the FDR p is the p value adjusted using False Discovery Rate; the Impact is the pathway impact value calculated from pathway topology analysis.

|                                                     | Total | Expected | Hits | Raw p    | -log10(p) | Holm adjust | FDR      | Impact |
|-----------------------------------------------------|-------|----------|------|----------|-----------|-------------|----------|--------|
| Aminoacyl-tRNA biosynthesis                         | 48    | 0.90     | 13   | 2.04E-13 | 1.27E+01  | 1.71E-11    | 1.71E-11 | 0.00   |
| Valine, leucine and isoleucine biosynthesis         | 8     | 0.15     | 4    | 6.59E-06 | 5.18E+00  | 5.47E-04    | 2.77E-04 | 0.00   |
| Arginine biosynthesis                               | 14    | 0.26     | 3    | 1.87E-03 | 2.73E+00  | 1.53E-01    | 4.16E-02 | 0.06   |
| Phenylalanine, tyrosine and tryptophan biosynthesis | 4     | 0.07     | 2    | 1.98E-03 | 2.70E+00  | 1.61E-01    | 4.16E-02 | 1.00   |
| Taurine and hypotaurine metabolism                  | 8     | 0.15     | 2    | 8.83E-03 | 2.05E+00  | 7.06E-01    | 1.48E-01 | 0.71   |
| Phenylalanine metabolism                            | 10    | 0.19     | 2    | 1.39E-02 | 1.86E+00  | 1.00E+00    | 1.69E-01 | 0.36   |
| Alanine, aspartate and glutamate metabolism         | 28    | 0.52     | 3    | 1.41E-02 | 1.85E+00  | 1.00E+00    | 1.69E-01 | 0.34   |
| Glycine, serine and threonine metabolism            | 33    | 0.62     | 3    | 2.20E-02 | 1.66E+00  | 1.00E+00    | 2.06E-01 | 0.09   |
| Cysteine and methionine metabolism                  | 33    | 0.62     | 3    | 2.20E-02 | 1.66E+00  | 1.00E+00    | 2.06E-01 | 0.13   |
| Nicotinate and nicotinamide metabolism              | 15    | 0.28     | 2    | 3.05E-02 | 1.52E+00  | 1.00E+00    | 2.56E-01 | 0.00   |
| Histidine metabolism                                | 16    | 0.30     | 2    | 3.45E-02 | 1.46E+00  | 1.00E+00    | 2.56E-01 | 0.22   |
| Valine, leucine and isoleucine degradation          | 40    | 0.75     | 3    | 3.66E-02 | 1.44E+00  | 1.00E+00    | 2.56E-01 | 0.00   |
| Pantothenate and CoA biosynthesis                   | 19    | 0.36     | 2    | 4.75E-02 | 1.32E+00  | 1.00E+00    | 3.07E-01 | 0.00   |
| beta-Alanine metabolism                             | 21    | 0.39     | 2    | 5.70E-02 | 1.24E+00  | 1.00E+00    | 3.42E-01 | 0.00   |
| Linoleic acid metabolism                            | 5     | 0.09     | 1    | 9.02E-02 | 1.04E+00  | 1.00E+00    | 5.05E-01 | 1.00   |
| D-Glutamine and D-glutamate metabolism              | 6     | 0.11     | 1    | 1.07E-01 | 9.69E-01  | 1.00E+00    | 5.30E-01 | 0.00   |
| Nitrogen metabolism                                 | 6     | 0.11     | 1    | 1.07E-01 | 9.69E-01  | 1.00E+00    | 5.30E-01 | 0.00   |
| Purine metabolism                                   | 65    | 1.22     | 3    | 1.19E-01 | 9.26E-01  | 1.00E+00    | 5.53E-01 | 0.02   |
| Biosynthesis of unsaturated fatty acids             | 36    | 0.67     | 2    | 1.44E-01 | 8.41E-01  | 1.00E+00    | 6.26E-01 | 0.00   |
| Ubiquinone and other terpenoid-quinone biosynthesis | 9     | 0.17     | 1    | 1.57E-01 | 8.05E-01  | 1.00E+00    | 6.26E-01 | 0.00   |
| Arginine and proline metabolism                     | 38    | 0.71     | 2    | 1.57E-01 | 8.03E-01  | 1.00E+00    | 6.26E-01 | 0.12   |
| Pyrimidine metabolism                               | 39    | 0.73     | 2    | 1.64E-01 | 7.85E-01  | 1.00E+00    | 6.26E-01 | 0.01   |
| Biotin metabolism                                   | 10    | 0.19     | 1    | 1.73E-01 | 7.63E-01  | 1.00E+00    | 6.30E-01 | 0.00   |
| Selenocompound metabolism                           | 20    | 0.37     | 1    | 3.16E-01 | 5.00E-01  | 1.00E+00    | 1.00E+00 | 0.00   |
| Lysine degradation                                  | 25    | 0.47     | 1    | 3.79E-01 | 4.22E-01  | 1.00E+00    | 1.00E+00 | 0.00   |
| Glycolysis / Gluconeogenesis                        | 26    | 0.49     | 1    | 3.90E-01 | 4.08E-01  | 1.00E+00    | 1.00E+00 | 0.00   |
| Glutathione metabolism                              | 28    | 0.52     | 1    | 4.13E-01 | 3.84E-01  | 1.00E+00    | 1.00E+00 | 0.00   |
| Glyoxylate and dicarboxylate metabolism             | 32    | 0.60     | 1    | 4.57E-01 | 3.40E-01  | 1.00E+00    | 1.00E+00 | 0.00   |
| Tryptophan metabolism                               | 41    | 0.77     | 1    | 5.44E-01 | 2.65E-01  | 1.00E+00    | 1.00E+00 | 0.14   |
| Tyrosine metabolism                                 | 42    | 0.79     | 1    | 5.52E-01 | 2.58E-01  | 1.00E+00    | 1.00E+00 | 0.14   |
| Primary bile acid biosynthesis                      | 46    | 0.86     | 1    | 5.86E-01 | 2.32E-01  | 1.00E+00    | 1.00E+00 | 0.01   |

**Table S4. Pathway analysis on up-regulated metabolites in DMSO vehicle treated conditioned media (CM\_Vehicle) of HCT116 compared to control media without cells (Control).**

The Total is the total number of compounds in the pathway; the Hits is the actually matched number from the user uploaded data; the Raw p is the original p value calculated from the enrichment analysis; the Holm p is the p value adjusted by Holm-Bonferroni method; the FDR p is the p value adjusted using False Discovery Rate; the Impact is the pathway impact value calculated from pathway topology analysis.

|                                             | Total | Expected | Hits | Raw p    | -log10(p) | Holm adjust | FDR      | Impact |
|---------------------------------------------|-------|----------|------|----------|-----------|-------------|----------|--------|
| Alanine, aspartate and glutamate metabolism | 28    | 0.38     | 6    | 8.91E-07 | 6.05E+00  | 7.48E-05    | 7.48E-05 | 0.33   |
| Citrate cycle (TCA cycle)                   | 20    | 0.27     | 4    | 1.05E-04 | 3.98E+00  | 8.72E-03    | 4.36E-03 | 0.18   |
| Pyruvate metabolism                         | 22    | 0.30     | 4    | 1.56E-04 | 3.81E+00  | 1.28E-02    | 4.36E-03 | 0.24   |
| Glyoxylate and dicarboxylate metabolism     | 32    | 0.43     | 4    | 7.01E-04 | 3.15E+00  | 5.68E-02    | 1.19E-02 | 0.11   |
| Arginine biosynthesis                       | 14    | 0.19     | 3    | 7.10E-04 | 3.15E+00  | 5.68E-02    | 1.19E-02 | 0.12   |
| D-Glutamine and D-glutamate metabolism      | 6     | 0.08     | 2    | 2.54E-03 | 2.60E+00  | 2.01E-01    | 3.55E-02 | 0.50   |
| Butanoate metabolism                        | 15    | 0.20     | 2    | 1.65E-02 | 1.78E+00  | 1.00E+00    | 1.98E-01 | 0.00   |
| Aminoacyl-tRNA biosynthesis                 | 48    | 0.65     | 3    | 2.51E-02 | 1.60E+00  | 1.00E+00    | 2.63E-01 | 0.00   |
| Glycolysis / Gluconeogenesis                | 26    | 0.35     | 2    | 4.67E-02 | 1.33E+00  | 1.00E+00    | 4.36E-01 | 0.10   |
| Glutathione metabolism                      | 28    | 0.38     | 2    | 5.35E-02 | 1.27E+00  | 1.00E+00    | 4.49E-01 | 0.11   |
| Porphyrin and chlorophyll metabolism        | 30    | 0.41     | 2    | 6.06E-02 | 1.22E+00  | 1.00E+00    | 4.63E-01 | 0.00   |
| Cysteine and methionine metabolism          | 33    | 0.45     | 2    | 7.18E-02 | 1.14E+00  | 1.00E+00    | 4.64E-01 | 0.03   |
| Glycine, serine and threonine metabolism    | 33    | 0.45     | 2    | 7.18E-02 | 1.14E+00  | 1.00E+00    | 4.64E-01 | 0.25   |
| Nitrogen metabolism                         | 6     | 0.08     | 1    | 7.87E-02 | 1.10E+00  | 1.00E+00    | 4.72E-01 | 0.00   |
| Arginine and proline metabolism             | 38    | 0.51     | 2    | 9.18E-02 | 1.04E+00  | 1.00E+00    | 5.14E-01 | 0.09   |
| Tryptophan metabolism                       | 41    | 0.56     | 2    | 1.04E-01 | 9.81E-01  | 1.00E+00    | 5.38E-01 | 0.20   |
| Tyrosine metabolism                         | 42    | 0.57     | 2    | 1.09E-01 | 9.63E-01  | 1.00E+00    | 5.38E-01 | 0.02   |
| Vitamin B6 metabolism                       | 9     | 0.12     | 1    | 1.16E-01 | 9.36E-01  | 1.00E+00    | 5.40E-01 | 0.49   |
| Nicotinate and nicotinamide metabolism      | 15    | 0.20     | 1    | 1.86E-01 | 7.31E-01  | 1.00E+00    | 7.88E-01 | 0.19   |
| Histidine metabolism                        | 16    | 0.22     | 1    | 1.97E-01 | 7.06E-01  | 1.00E+00    | 7.88E-01 | 0.00   |
| Glycerolipid metabolism                     | 16    | 0.22     | 1    | 1.97E-01 | 7.06E-01  | 1.00E+00    | 7.88E-01 | 0.04   |
| Glycerophospholipid metabolism              | 36    | 0.49     | 1    | 3.91E-01 | 4.07E-01  | 1.00E+00    | 1.00E+00 | 0.08   |
| Amino sugar and nucleotide sugar metabolism | 37    | 0.50     | 1    | 4.00E-01 | 3.98E-01  | 1.00E+00    | 1.00E+00 | 0.00   |
| Pyrimidine metabolism                       | 39    | 0.53     | 1    | 4.16E-01 | 3.80E-01  | 1.00E+00    | 1.00E+00 | 0.05   |
| Primary bile acid biosynthesis              | 46    | 0.62     | 1    | 4.71E-01 | 3.27E-01  | 1.00E+00    | 1.00E+00 | 0.01   |
| Fatty acid biosynthesis                     | 47    | 0.64     | 1    | 4.78E-01 | 3.20E-01  | 1.00E+00    | 1.00E+00 | 0.00   |
| Purine metabolism                           | 65    | 0.88     | 1    | 5.96E-01 | 2.25E-01  | 1.00E+00    | 1.00E+00 | 0.00   |

**Table S5. Pathway analysis on down-regulated metabolites in DMSO vehicle treated conditioned media (CM\_Vehicle) of LoVo compared to control media without cells (Control).**

The Total is the total number of compounds in the pathway; the Hits is the actually matched number from the user uploaded data; the Raw p is the original p value calculated from the enrichment analysis; the Holm p is the p value adjusted by Holm-Bonferroni method; the FDR p is the p value adjusted using False Discovery Rate; the Impact is the pathway impact value calculated from pathway topology analysis.

|                                                     | Total | Expected | Hits | Raw p    | -log10(p) | Holm adjust | FDR      | Impact |
|-----------------------------------------------------|-------|----------|------|----------|-----------|-------------|----------|--------|
| Aminoacyl-tRNA biosynthesis                         | 48    | 0.81     | 12   | 1.29E-12 | 1.19E+01  | 1.08E-10    | 1.08E-10 | 0.00   |
| Valine, leucine and isoleucine biosynthesis         | 8     | 0.13     | 3    | 2.22E-04 | 3.65E+00  | 1.84E-02    | 9.33E-03 | 0.00   |
| Phenylalanine, tyrosine and tryptophan biosynthesis | 4     | 0.07     | 2    | 1.59E-03 | 2.80E+00  | 1.30E-01    | 4.45E-02 | 1.00   |
| Taurine and hypotaurine metabolism                  | 8     | 0.13     | 2    | 7.12E-03 | 2.15E+00  | 5.77E-01    | 1.50E-01 | 0.71   |
| Alanine, aspartate and glutamate metabolism         | 28    | 0.47     | 3    | 1.04E-02 | 1.98E+00  | 8.32E-01    | 1.57E-01 | 0.34   |
| Phenylalanine metabolism                            | 10    | 0.17     | 2    | 1.12E-02 | 1.95E+00  | 8.86E-01    | 1.57E-01 | 0.36   |
| Glycine, serine and threonine metabolism            | 33    | 0.55     | 3    | 1.64E-02 | 1.79E+00  | 1.00E+00    | 1.97E-01 | 0.09   |
| Biosynthesis of unsaturated fatty acids             | 36    | 0.60     | 3    | 2.07E-02 | 1.68E+00  | 1.00E+00    | 2.03E-01 | 0.00   |
| Arginine biosynthesis                               | 14    | 0.23     | 2    | 2.18E-02 | 1.66E+00  | 1.00E+00    | 2.03E-01 | 0.00   |
| Nicotinate and nicotinamide metabolism              | 15    | 0.25     | 2    | 2.49E-02 | 1.60E+00  | 1.00E+00    | 2.09E-01 | 0.00   |
| Histidine metabolism                                | 16    | 0.27     | 2    | 2.81E-02 | 1.55E+00  | 1.00E+00    | 2.15E-01 | 0.22   |
| beta-Alanine metabolism                             | 21    | 0.35     | 2    | 4.67E-02 | 1.33E+00  | 1.00E+00    | 3.27E-01 | 0.00   |
| Linoleic acid metabolism                            | 5     | 0.08     | 1    | 8.12E-02 | 1.09E+00  | 1.00E+00    | 5.25E-01 | 1.00   |
| D-Glutamine and D-glutamate metabolism              | 6     | 0.10     | 1    | 9.67E-02 | 1.01E+00  | 1.00E+00    | 5.41E-01 | 0.00   |
| Nitrogen metabolism                                 | 6     | 0.10     | 1    | 9.67E-02 | 1.01E+00  | 1.00E+00    | 5.41E-01 | 0.00   |
| Cysteine and methionine metabolism                  | 33    | 0.55     | 2    | 1.04E-01 | 9.83E-01  | 1.00E+00    | 5.46E-01 | 0.13   |
| Pyrimidine metabolism                               | 39    | 0.65     | 2    | 1.37E-01 | 8.62E-01  | 1.00E+00    | 6.33E-01 | 0.01   |
| Ubiquinone and other terpenoid-quinone biosynthesis | 9     | 0.15     | 1    | 1.42E-01 | 8.49E-01  | 1.00E+00    | 6.33E-01 | 0.00   |
| Valine, leucine and isoleucine degradation          | 40    | 0.67     | 2    | 1.43E-01 | 8.44E-01  | 1.00E+00    | 6.33E-01 | 0.00   |
| Biotin metabolism                                   | 10    | 0.17     | 1    | 1.56E-01 | 8.07E-01  | 1.00E+00    | 6.55E-01 | 0.00   |
| Pantothenate and CoA biosynthesis                   | 19    | 0.32     | 1    | 2.76E-01 | 5.59E-01  | 1.00E+00    | 1.00E+00 | 0.00   |
| Selenocompound metabolism                           | 20    | 0.34     | 1    | 2.89E-01 | 5.40E-01  | 1.00E+00    | 1.00E+00 | 0.00   |
| Purine metabolism                                   | 65    | 1.09     | 2    | 2.98E-01 | 5.25E-01  | 1.00E+00    | 1.00E+00 | 0.02   |
| Lysine degradation                                  | 25    | 0.42     | 1    | 3.47E-01 | 4.60E-01  | 1.00E+00    | 1.00E+00 | 0.00   |
| Glycolysis / Gluconeogenesis                        | 26    | 0.44     | 1    | 3.58E-01 | 4.46E-01  | 1.00E+00    | 1.00E+00 | 0.00   |
| Glyoxylate and dicarboxylate metabolism             | 32    | 0.54     | 1    | 4.21E-01 | 3.75E-01  | 1.00E+00    | 1.00E+00 | 0.00   |
| Arginine and proline metabolism                     | 38    | 0.64     | 1    | 4.78E-01 | 3.20E-01  | 1.00E+00    | 1.00E+00 | 0.01   |
| Tryptophan metabolism                               | 41    | 0.69     | 1    | 5.05E-01 | 2.97E-01  | 1.00E+00    | 1.00E+00 | 0.14   |
| Tyrosine metabolism                                 | 42    | 0.70     | 1    | 5.13E-01 | 2.90E-01  | 1.00E+00    | 1.00E+00 | 0.14   |
| Primary bile acid biosynthesis                      | 46    | 0.77     | 1    | 5.46E-01 | 2.63E-01  | 1.00E+00    | 1.00E+00 | 0.01   |

**Table S6. Pathway analysis on up-regulated metabolites in DMSO vehicle treated conditioned media (CM\_Vehicle) of LoVo compared to control media without cells (Control).**

The Total is the total number of compounds in the pathway; the Hits is the actually matched number from the user uploaded data; the Raw p is the original p value calculated from the enrichment analysis; the Holm p is the p value adjusted by Holm-Bonferroni method; the FDR p is the p value adjusted using False Discovery Rate; the Impact is the pathway impact value calculated from pathway topology analysis.

|                                             | Total | Expected | Hits | Raw p    | -log10(p) | Holm adjust | FDR      | Impact |
|---------------------------------------------|-------|----------|------|----------|-----------|-------------|----------|--------|
| Citrate cycle (TCA cycle)                   | 20    | 0.32     | 5    | 9.45E-06 | 5.02E+00  | 7.94E-04    | 7.94E-04 | 0.23   |
| Arginine biosynthesis                       | 14    | 0.23     | 4    | 4.74E-05 | 4.32E+00  | 3.93E-03    | 1.54E-03 | 0.35   |
| Alanine, aspartate and glutamate metabolism | 28    | 0.45     | 5    | 5.49E-05 | 4.26E+00  | 4.50E-03    | 1.54E-03 | 0.33   |
| Glyoxylate and dicarboxylate metabolism     | 32    | 0.52     | 5    | 1.08E-04 | 3.97E+00  | 8.72E-03    | 2.26E-03 | 0.13   |
| Pyruvate metabolism                         | 22    | 0.35     | 4    | 3.17E-04 | 3.50E+00  | 2.54E-02    | 5.33E-03 | 0.24   |
| Butanoate metabolism                        | 15    | 0.24     | 3    | 1.49E-03 | 2.83E+00  | 1.17E-01    | 2.08E-02 | 0.00   |
| D-Glutamine and D-glutamate metabolism      | 6     | 0.10     | 2    | 3.60E-03 | 2.44E+00  | 2.81E-01    | 4.32E-02 | 0.50   |
| Glutathione metabolism                      | 28    | 0.45     | 3    | 9.31E-03 | 2.03E+00  | 7.17E-01    | 9.78E-02 | 0.11   |
| Glycine, serine and threonine metabolism    | 33    | 0.53     | 3    | 1.47E-02 | 1.83E+00  | 1.00E+00    | 1.37E-01 | 0.25   |
| Pantothenate and CoA biosynthesis           | 19    | 0.31     | 2    | 3.61E-02 | 1.44E+00  | 1.00E+00    | 3.03E-01 | 0.01   |
| Aminoacyl-tRNA biosynthesis                 | 48    | 0.77     | 3    | 3.97E-02 | 1.40E+00  | 1.00E+00    | 3.03E-01 | 0.00   |
| Riboflavin metabolism                       | 4     | 0.06     | 1    | 6.30E-02 | 1.20E+00  | 1.00E+00    | 4.14E-01 | 0.50   |
| Glycolysis / Gluconeogenesis                | 26    | 0.42     | 2    | 6.41E-02 | 1.19E+00  | 1.00E+00    | 4.14E-01 | 0.10   |
| Porphyrin and chlorophyll metabolism        | 30    | 0.48     | 2    | 8.25E-02 | 1.08E+00  | 1.00E+00    | 4.95E-01 | 0.00   |
| Nitrogen metabolism                         | 6     | 0.10     | 1    | 9.31E-02 | 1.03E+00  | 1.00E+00    | 5.11E-01 | 0.00   |
| Cysteine and methionine metabolism          | 33    | 0.53     | 2    | 9.73E-02 | 1.01E+00  | 1.00E+00    | 5.11E-01 | 0.10   |
| Thiamine metabolism                         | 7     | 0.11     | 1    | 1.08E-01 | 9.67E-01  | 1.00E+00    | 5.33E-01 | 0.00   |
| Taurine and hypotaurine metabolism          | 8     | 0.13     | 1    | 1.22E-01 | 9.13E-01  | 1.00E+00    | 5.46E-01 | 0.00   |
| Arginine and proline metabolism             | 38    | 0.61     | 2    | 1.23E-01 | 9.09E-01  | 1.00E+00    | 5.46E-01 | 0.09   |
| Vitamin B6 metabolism                       | 9     | 0.15     | 1    | 1.36E-01 | 8.65E-01  | 1.00E+00    | 5.55E-01 | 0.49   |
| Tryptophan metabolism                       | 41    | 0.66     | 2    | 1.40E-01 | 8.54E-01  | 1.00E+00    | 5.55E-01 | 0.20   |
| Tyrosine metabolism                         | 42    | 0.68     | 2    | 1.45E-01 | 8.37E-01  | 1.00E+00    | 5.55E-01 | 0.02   |
| Nicotinate and nicotinamide metabolism      | 15    | 0.24     | 1    | 2.17E-01 | 6.63E-01  | 1.00E+00    | 7.73E-01 | 0.19   |
| Histidine metabolism                        | 16    | 0.26     | 1    | 2.30E-01 | 6.38E-01  | 1.00E+00    | 7.73E-01 | 0.00   |
| Glycerolipid metabolism                     | 16    | 0.26     | 1    | 2.30E-01 | 6.38E-01  | 1.00E+00    | 7.73E-01 | 0.04   |
| Glycerophospholipid metabolism              | 36    | 0.58     | 1    | 4.47E-01 | 3.50E-01  | 1.00E+00    | 1.00E+00 | 0.08   |
| Pyrimidine metabolism                       | 39    | 0.63     | 1    | 4.74E-01 | 3.24E-01  | 1.00E+00    | 1.00E+00 | 0.05   |
| Primary bile acid biosynthesis              | 46    | 0.74     | 1    | 5.32E-01 | 2.74E-01  | 1.00E+00    | 1.00E+00 | 0.01   |

**Table S7. Overlap of fold change of metabolite levels in DMSO vehicle treated conditioned media (CM\_Vehicle) of HCT116 and LoVo compared to control media without cells (Control).**

| Metabolite             | log2 (fold change, down-regulated) |       | Metabolite           | log2 (fold change, up-regulated) |      |
|------------------------|------------------------------------|-------|----------------------|----------------------------------|------|
|                        | HCT116                             | LoVo  |                      | HCT116                           | LoVo |
| Hypoxanthine           | -6.49                              | -6.48 | Glycerol 3-phosphate | 5.94                             | 3.45 |
| Niacin / nicotinate    | -5.64                              | -6.73 | Alpha-Ketoglutarate  | 3.95                             | 4.10 |
| Linoleic acid          | -4.79                              | -2.89 | Orotic acid          | 3.80                             | 6.29 |
| Cytidine               | -4.69                              | -5.38 | Pyruvate             | 3.25                             | 2.86 |
| Glutamine              | -4.45                              | -4.78 | Lactate              | 2.91                             | 2.97 |
| Serine                 | -2.28                              | -2.53 | N-acetylaspartate    | 2.85                             | 3.54 |
| Taurine                | -1.90                              | -2.09 | Serotonin            | 1.59                             | 1.99 |
| Oleic acid             | -1.74                              | -1.43 | pyridoxal            | 1.26                             | 1.93 |
| Palmitoleic acid       | -1.44                              | -1.91 | acetyllysine         | 0.94                             | 1.67 |
| Tryptophan             | -1.39                              | -2.05 | Malate               | 0.61                             | 0.72 |
| Creatine               | -1.39                              | -1.71 | Fumarate             | 0.45                             | 0.53 |
| Leucine                | -1.01                              | -0.68 | glutamate            | 0.40                             | 0.22 |
| Lysine                 | -0.99                              | -0.85 | Glycine              | 0.34                             | 0.22 |
| Methionine             | -0.94                              | -1.29 | L-Kynurenine         | 0.24                             | 0.40 |
| Threonine              | -0.80                              | -0.98 | Creatinine           | 0.19                             | 0.24 |
| Glucose                | -0.69                              | -0.83 |                      |                                  |      |
| Tyrosine               | -0.66                              | -0.85 |                      |                                  |      |
| L-Alanine              | -0.50                              | -1.32 |                      |                                  |      |
| L-Sarcosine            | -0.50                              | -1.32 |                      |                                  |      |
| Histidine              | -0.50                              | -0.65 |                      |                                  |      |
| Phenylalanine          | -0.49                              | -0.67 |                      |                                  |      |
| Cysteine sulfinic acid | -0.47                              | -0.76 |                      |                                  |      |
| IsoLeucine             | -0.46                              | -0.73 |                      |                                  |      |
| carnitine              | -0.45                              | -0.75 |                      |                                  |      |
| Aspartate              | -0.36                              | -0.72 |                      |                                  |      |

**Table S8. Fold change of metabolite levels in 5-FU treated conditioned media (CM\_5-FU) of HCT116 compared to DMSO vehicle treated conditioned media (CM\_Vehicle).**

| <b>Metabolite</b>    | <b>log2 (fold change, down-regulated)</b> | <b>Metabolite</b>  | <b>log2 (fold change, up-regulated)</b> |
|----------------------|-------------------------------------------|--------------------|-----------------------------------------|
| Orotic acid          | -1.84                                     | Glutamine          | 4.02                                    |
| Glycerol 3-phosphate | -1.02                                     | Niacin/ Nicotinate | 2.96                                    |
| Lactate              | -1.01                                     | Hypoxanthine       | 2.24                                    |
| Acetyllysine         | -0.53                                     | Octanoyl-carnitine | 2.21                                    |
| Asparagine           | -0.51                                     | Palmitoleic acid   | 1.74                                    |
| Alpha-Ketoglutarate  | -0.46                                     | Serine             | 1.66                                    |
| N-acetylaspartate    | -0.25                                     | Oleic acid         | 1.55                                    |
| Fructose             | -0.20                                     | Taurine            | 1.55                                    |
| Glutamate            | -0.18                                     | Tryptophan         | 1.18                                    |
| Creatinine           | -0.17                                     | Lysine             | 0.88                                    |
|                      |                                           | Creatine           | 0.84                                    |
|                      |                                           | Ornithine          | 0.83                                    |
|                      |                                           | Pyruvate           | 0.79                                    |
|                      |                                           | Methionine         | 0.71                                    |
|                      |                                           | Leucine            | 0.69                                    |
|                      |                                           | Valine             | 0.64                                    |
|                      |                                           | Cystine            | 0.57                                    |
|                      |                                           | Threonine          | 0.56                                    |
|                      |                                           | Tyrosine           | 0.50                                    |
|                      |                                           | L-Alanine          | 0.44                                    |
|                      |                                           | L-Sarcosine        | 0.44                                    |
|                      |                                           | Cytidine           | 0.42                                    |
|                      |                                           | Glucose            | 0.39                                    |
|                      |                                           | Histidine          | 0.38                                    |
|                      |                                           | Phenylalanine      | 0.37                                    |
|                      |                                           | IsoLeucine         | 0.33                                    |
|                      |                                           | Carnitine          | 0.24                                    |

**Table S9. Fold change of metabolite levels in 5-FU treated conditioned media (CM\_5-FU) of LoVo compared to DMSO vehicle treated conditioned media (CM\_Vehicle).**

| <b>Metabolite</b> | <b>log2 (fold change, down-regulated)</b> | <b>Metabolite</b>           | <b>log2 (fold change, up-regulated)</b> |
|-------------------|-------------------------------------------|-----------------------------|-----------------------------------------|
| Cysteine          | -1.46                                     | Docosahexaenoic acid        | 4.59                                    |
| Butyric acid      | -1.08                                     | Glutamine                   | 4.03                                    |
| Acetyllysine      | -0.93                                     | Niacin/ Nicotinate          | 1.85                                    |
| Lactate           | -0.79                                     | Oxoadipate                  | 1.78                                    |
| Serine            | -0.77                                     | Threonine                   | 1.65                                    |
| Folate            | -0.67                                     | Pyruvate                    | 1.65                                    |
| Cis-aconitate     | -0.57                                     | Hypoxanthine                | 1.51                                    |
| Acetylcysteine    | -0.45                                     | Cytidine                    | 1.49                                    |
| L-Kynurenine      | -0.35                                     | Dodecanoic acid/Lauric acid | 1.35                                    |
| Citrulline        | -0.34                                     | L-Alanine                   | 1.26                                    |
| Carnosine         | -0.25                                     | L-Sarcosine                 | 1.26                                    |
| Fructose          | -0.24                                     | Creatine                    | 1.09                                    |
| Hexanoic acid     | -0.24                                     | Phenylalanine               | 1.05                                    |
| Betaine           | -0.22                                     | Methionine                  | 0.93                                    |
|                   |                                           | Linoleic acid               | 0.78                                    |
|                   |                                           | Lysine                      | 0.77                                    |
|                   |                                           | Oleic acid                  | 0.76                                    |
|                   |                                           | Serotonin                   | 0.70                                    |
|                   |                                           | Myristic acid               | 0.60                                    |
|                   |                                           | Tryptophan                  | 0.55                                    |
|                   |                                           | Palmitoleic acid            | 0.50                                    |
|                   |                                           | IsoLeucine                  | 0.40                                    |
|                   |                                           | Aspartate                   | 0.32                                    |



**Table S10. Pathway analysis on the overlap of metabolites in 5-FU treated conditioned media (CM\_5-FU) of HCT116 and LoVo compared to DMSO vehicle treated conditioned media (CM\_Vehicle).**

The Total is the total number of compounds in the pathway; the Hits is the actually matched number from the user uploaded data; the Raw p is the original p value calculated from the enrichment analysis; the Holm p is the p value adjusted by Holm-Bonferroni method; the FDR p is the p value adjusted using False Discovery Rate; the Impact is the pathway impact value calculated from pathway topology analysis (maximum importance of each pathway is 1.0).

|                                                     | Total | Expected | Hits | Raw p    | -log10(p) | Holm adjust | FDR      | Impact |
|-----------------------------------------------------|-------|----------|------|----------|-----------|-------------|----------|--------|
| Aminoacyl-tRNA biosynthesis                         | 48    | 0.59     | 9    | 8.85E-10 | 9.05E+00  | 7.43E-08    | 7.43E-08 | 0.00   |
| Glycine, serine and threonine metabolism            | 33    | 0.40     | 4    | 5.28E-04 | 3.28E+00  | 4.38E-02    | 2.22E-02 | 0.09   |
| Phenylalanine, tyrosine and tryptophan biosynthesis | 4     | 0.05     | 2    | 8.42E-04 | 3.07E+00  | 6.91E-02    | 2.36E-02 | 1.00   |
| Valine, leucine and isoleucine biosynthesis         | 8     | 0.10     | 2    | 3.82E-03 | 2.42E+00  | 3.09E-01    | 7.09E-02 | 0.00   |
| Alanine, aspartate and glutamate metabolism         | 28    | 0.34     | 3    | 4.22E-03 | 2.37E+00  | 3.37E-01    | 7.09E-02 | 0.11   |
| Phenylalanine metabolism                            | 10    | 0.12     | 2    | 6.04E-03 | 2.22E+00  | 4.78E-01    | 8.46E-02 | 0.36   |
| Glyoxylate and dicarboxylate metabolism             | 32    | 0.39     | 2    | 5.68E-02 | 1.25E+00  | 1.00E+00    | 4.84E-01 | 0.00   |
| Linoleic acid metabolism                            | 5     | 0.06     | 1    | 5.99E-02 | 1.22E+00  | 1.00E+00    | 4.84E-01 | 1.00   |
| Cysteine and methionine metabolism                  | 33    | 0.40     | 2    | 6.00E-02 | 1.22E+00  | 1.00E+00    | 4.84E-01 | 0.10   |
| Biosynthesis of unsaturated fatty acids             | 36    | 0.44     | 2    | 7.00E-02 | 1.15E+00  | 1.00E+00    | 4.84E-01 | 0.00   |
| D-Glutamine and D-glutamate metabolism              | 6     | 0.07     | 1    | 7.14E-02 | 1.15E+00  | 1.00E+00    | 4.84E-01 | 0.00   |
| Nitrogen metabolism                                 | 6     | 0.07     | 1    | 7.14E-02 | 1.15E+00  | 1.00E+00    | 4.84E-01 | 0.00   |
| Arginine and proline metabolism                     | 38    | 0.47     | 2    | 7.70E-02 | 1.11E+00  | 1.00E+00    | 4.84E-01 | 0.01   |
| Pyrimidine metabolism                               | 39    | 0.48     | 2    | 8.06E-02 | 1.09E+00  | 1.00E+00    | 4.84E-01 | 0.01   |
| Tyrosine metabolism                                 | 42    | 0.51     | 2    | 9.17E-02 | 1.04E+00  | 1.00E+00    | 5.13E-01 | 0.14   |
| Ubiquinone and other terpenoid-quinone biosynthesis | 9     | 0.11     | 1    | 1.05E-01 | 9.77E-01  | 1.00E+00    | 5.53E-01 | 0.00   |
| Biotin metabolism                                   | 10    | 0.12     | 1    | 1.16E-01 | 9.34E-01  | 1.00E+00    | 5.75E-01 | 0.00   |
| Arginine biosynthesis                               | 14    | 0.17     | 1    | 1.59E-01 | 7.98E-01  | 1.00E+00    | 7.43E-01 | 0.00   |
| Nicotinate and nicotinamide metabolism              | 15    | 0.18     | 1    | 1.70E-01 | 7.71E-01  | 1.00E+00    | 7.50E-01 | 0.00   |
| Purine metabolism                                   | 65    | 0.80     | 2    | 1.88E-01 | 7.26E-01  | 1.00E+00    | 7.89E-01 | 0.02   |
| Selenocompound metabolism                           | 20    | 0.25     | 1    | 2.20E-01 | 6.58E-01  | 1.00E+00    | 8.39E-01 | 0.00   |
| Citrate cycle (TCA cycle)                           | 20    | 0.25     | 1    | 2.20E-01 | 6.58E-01  | 1.00E+00    | 8.39E-01 | 0.05   |
| Pyruvate metabolism                                 | 22    | 0.27     | 1    | 2.39E-01 | 6.21E-01  | 1.00E+00    | 8.73E-01 | 0.21   |
| Lysine degradation                                  | 25    | 0.31     | 1    | 2.67E-01 | 5.73E-01  | 1.00E+00    | 9.28E-01 | 0.00   |
| Glycolysis / Gluconeogenesis                        | 26    | 0.32     | 1    | 2.76E-01 | 5.59E-01  | 1.00E+00    | 9.28E-01 | 0.10   |
| Valine, leucine and isoleucine degradation          | 40    | 0.49     | 1    | 3.93E-01 | 4.05E-01  | 1.00E+00    | 1.00E+00 | 0.00   |
| Tryptophan metabolism                               | 41    | 0.50     | 1    | 4.01E-01 | 3.97E-01  | 1.00E+00    | 1.00E+00 | 0.14   |

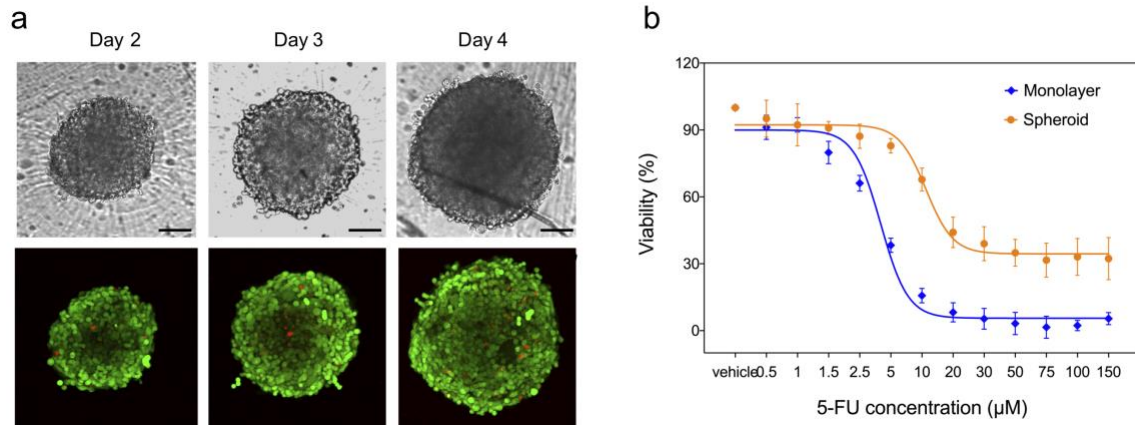

**Figure S1 3D tumor spheroid formation of HCT116 and drug responses to 5-FU**

(a) Representative live cell confocal fluorescence microscopy images showing HCT116 spheroid formation from day 2 to day 4 post seeding. Cell viability was assessed by live/dead staining using Calcein (green) and PI (red). Scale bars=100  $\mu\text{m}$ . (b). Dose responses of HCT116 cells to 5-FU. Cells were treated with different concentrations of 5-FU and cell viability was measured using MTS assays. The squares, circles and triangles represent measured viability normalized to the vehicle control, while the solid lines represent dose response curves. The symbols represent the average and the error bars represent the standard deviation (n=3).

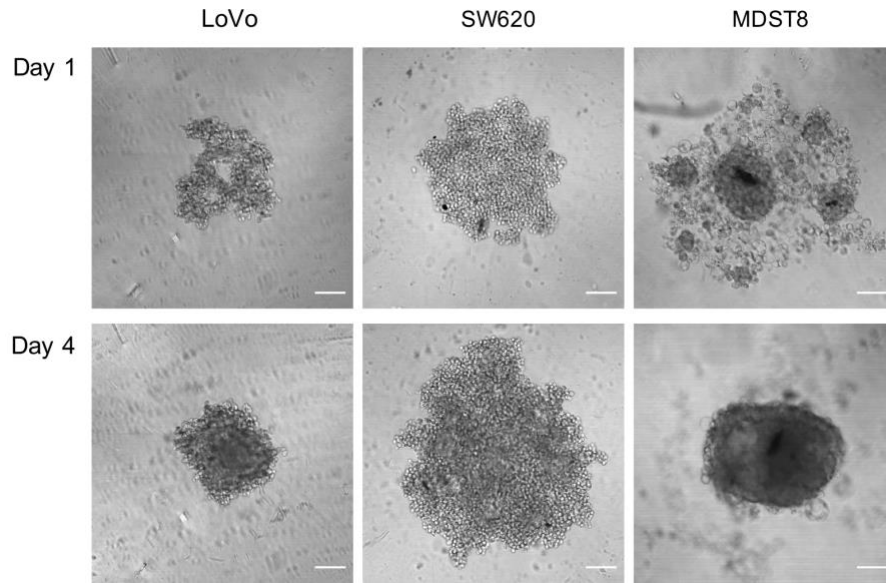

**Figure S2 3D tumor spheroid formation of CMS cell lines**

Representative bright field microscopy images showing LoVo, SW620 and MDST8 spheroid formation on day 1 and day 4 post seeding. Scale bars=100  $\mu$ m.

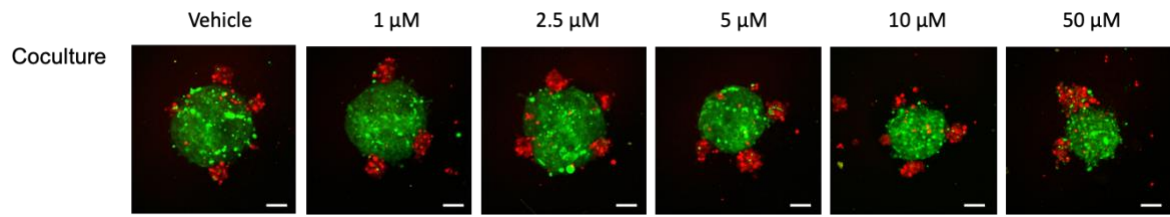

### Figure S3 Cocultured spheroids of HCT116 and MDST8

Representative live cell confocal fluorescence microscopy images showing spheroid morphology after 3 days of 5-FU treatment. HCT116 cells were stained with cell tracker CMFDA (green) fluorescent probes and SW620 cells were stained with CMRA (red) fluorescent probes. Scale bars=100 μm.

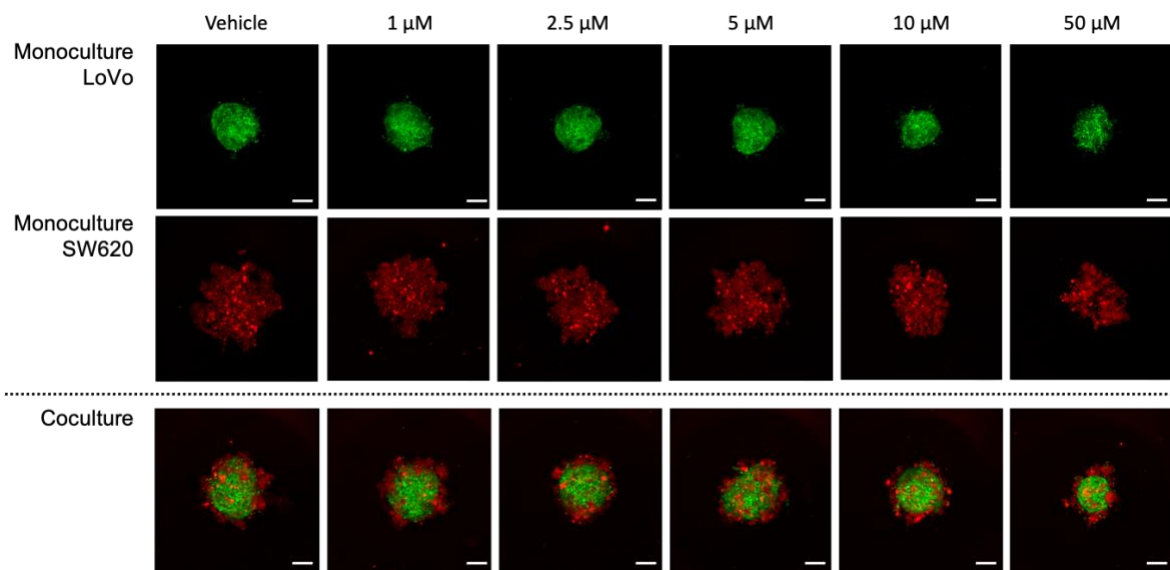

**Figure S4 Monocultured and cocultured spheroids of LoVo and SW620**

Representative live cell confocal fluorescence microscopy images showing spheroid morphology after 3 days of 5-FU treatment. LoVo cells expressed a GFP reporter (green) and SW620 cells were stained with cell tracker CMRA (red) fluorescent probes. Scale bars=100 μm.

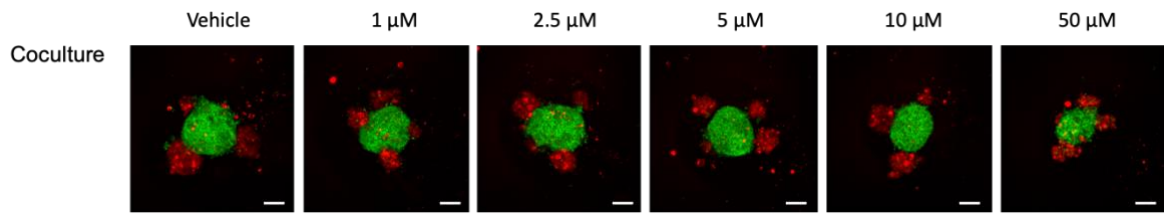

### Figure S5 Cocultured spheroids of LoVo and MDST8

Representative live cell confocal fluorescence microscopy images showing spheroid formation morphology after 3 days of 5-FU treatment. LoVo cells expressed a GFP reporter (green) and MDST8 cells were stained with cell tracker CMRA (red) fluorescent probes. Scale bars=100  $\mu\text{m}$ .

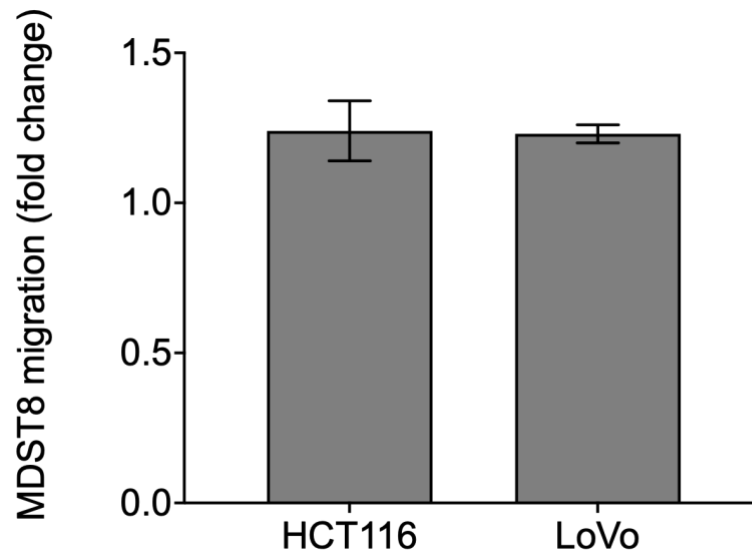

**Figure S6 MDST8 cell migration through transwell membrane**

Fold change of MDST8 migration through non-Matrigel coated transwell membrane when exposed to HCT116 or LoVo in the bottom wells. MDST8 exposed to only media without cells was taken as a control. Cells were treated with DMSO vehicle. The bars represent the average and the error bars represent the standard deviation (n=3). Statistical significance was calculated using a one-way ANOVA followed by Student's t-test. P-values of less than 0.05 and 0.01 were considered significant (\*) and highly significant (\*\*), respectively.

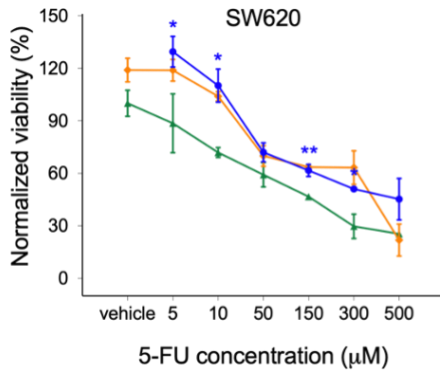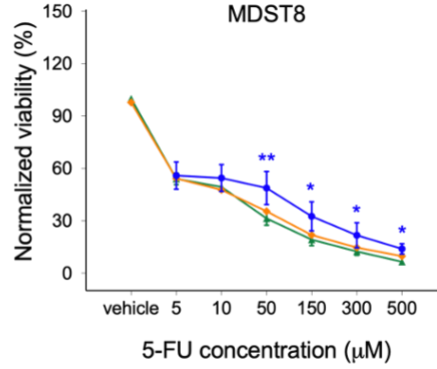

**b**

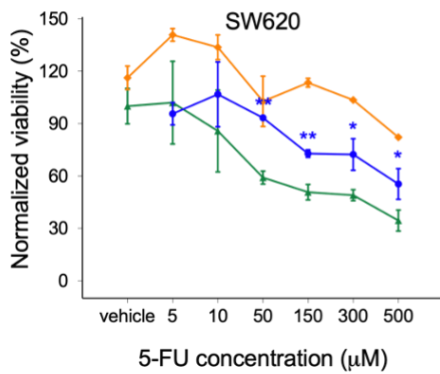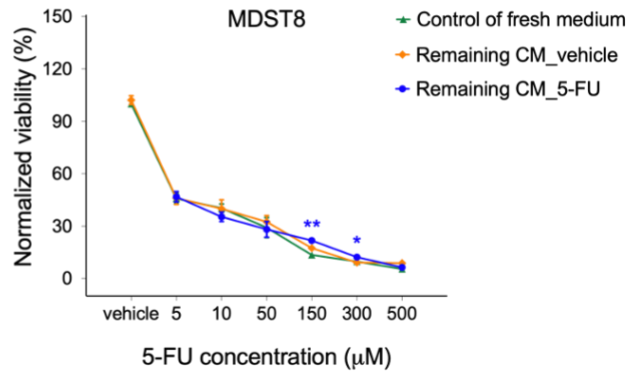

**Figure S7 Drug resistance effect of remaining CMS1 conditioned media (CM)**

CMS4 cells were treated with either remaining CM\_vehicle or remaining CM\_5-FU after the dialysis of metabolites, of (a) HCT116 or (b) LoVo CMS1 cells, and were exposed to different concentrations of 5-FU for 3 days. Cells treated with media only was taken as a control. Cell viability was measured using MTS assays. The squares, circles and triangles represent the average viability normalized to the control and the error bars represent the standard deviation (n=3). Statistical significance was calculated using a one-way ANOVA followed by Student's t-test. P-values of less than 0.05 and 0.01 were considered significant (\*) and highly significant (\*\*), respectively, when compared to the control.



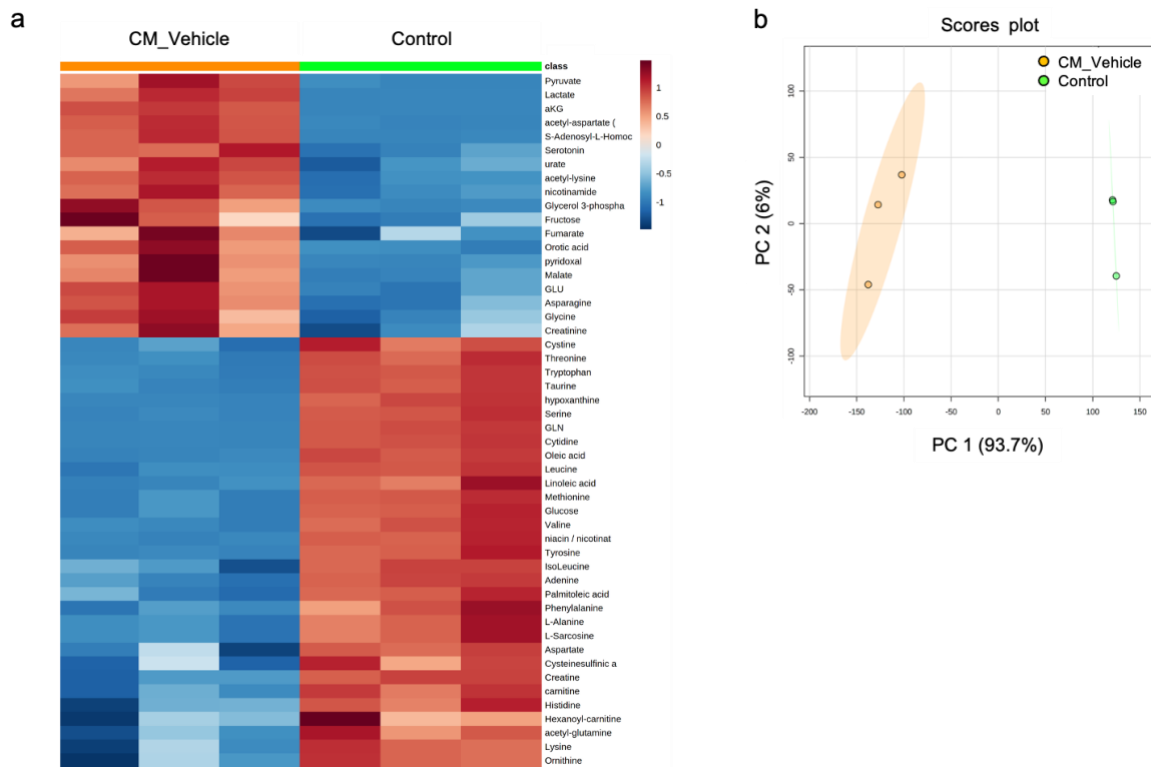

**Figure S8 Metabolite analyses of HCT116 conditioned media**

(a) Metabolomics profile of vehicle treated conditioned media (CM\_Vehicle, orange) of HCT116 compared to control media without cells (Control, green), presented as a heatmap visualization and hierarchical clustering analysis. Rows are metabolites and columns are samples (n=3). The color key indicates the metabolite expression value (blue, lowest; red, highest). (b) Principal component analysis (PCA) plotting showing clusters of samples based on their similarity. Statistical significance was calculated using a one-way ANOVA followed by Student's t-test ( $p < 0.05$ ).

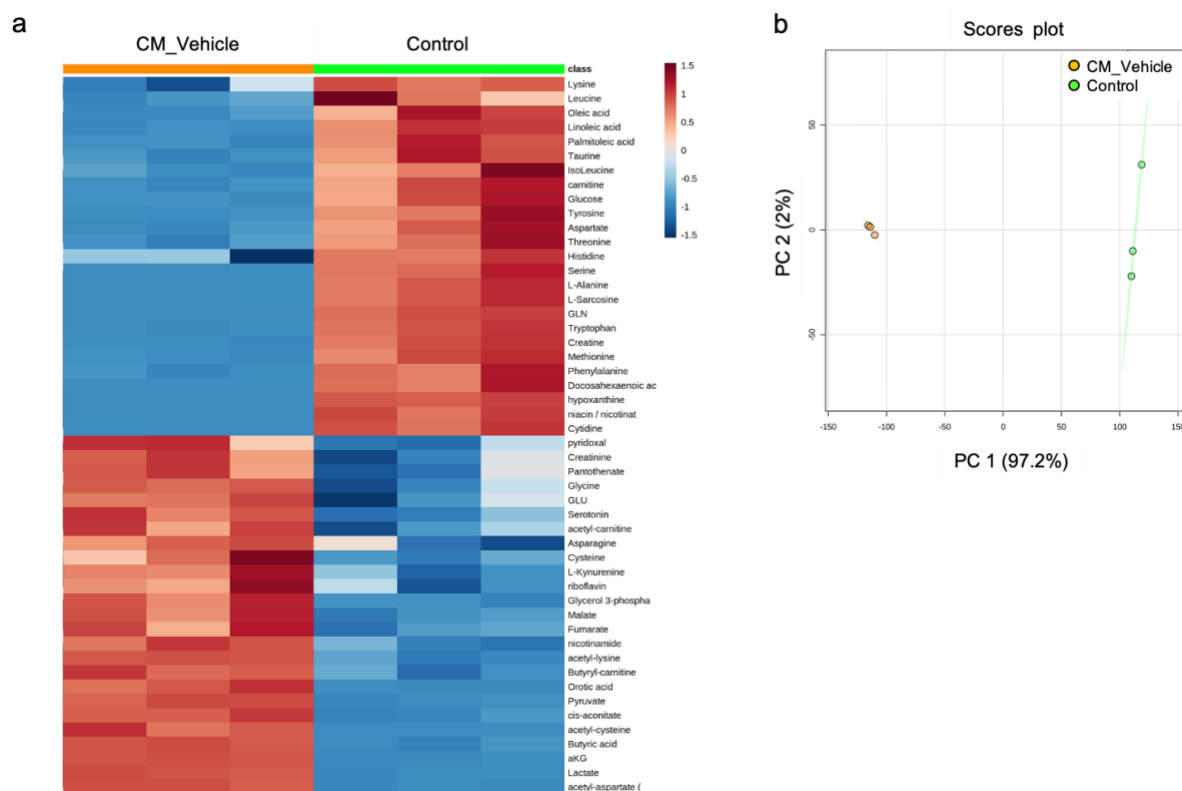

**Figure S9 Metabolite analyses of DMSO vehicle treated conditioned media of LoVo**

(a) Metabolomics profile of DMSO vehicle treated conditioned media (CM\_Vehicle, orange) of LoVo compared to control media without cells (Control, green), presented as a heatmap visualization and hierarchical clustering analysis. Rows are metabolites and columns are samples (n=3). The color key indicates the metabolite expression value (blue, lowest; red, highest). (b) Principal component analysis (PCA) plotting showing clusters of samples based on their similarity. Statistical significance was calculated using a one-way ANOVA followed by Student's t-test ( $p < 0.05$ ).

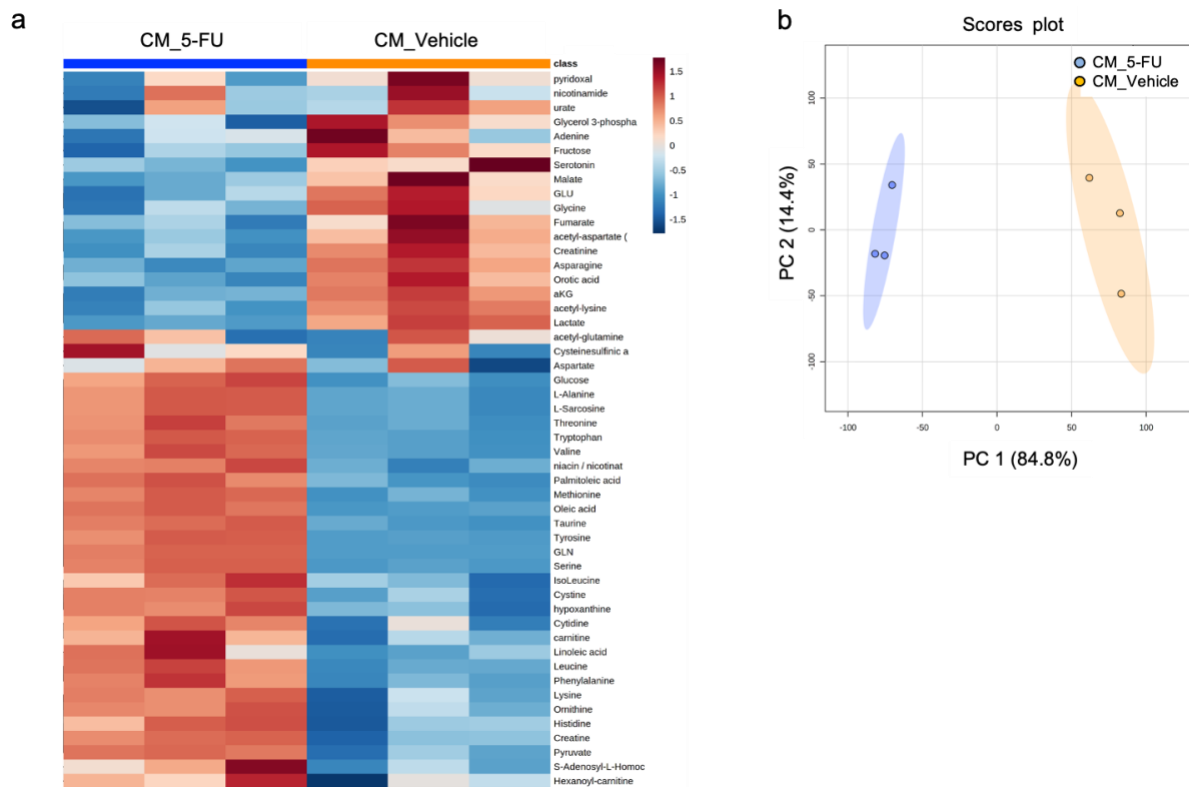

**Figure S10 Metabolite analyses of 5-FU treated conditioned media of HCT116**

(a) Metabolomics profile of 5-FU treated conditioned media (CM\_5-FU, blue) of HCT116 compared to DMSO vehicle treated conditioned media (CM\_Vehicle, orange), presented as a heatmap visualization and hierarchical clustering analysis. Rows are metabolites and columns are samples (n=3). The color key indicates the metabolite expression value (blue, lowest; red, highest). (b) Principal component analysis (PCA) plotting showing clusters of samples based on their similarity. Statistical significance was calculated using a one-way ANOVA followed by Student's t-test ( $p < 0.05$ ).

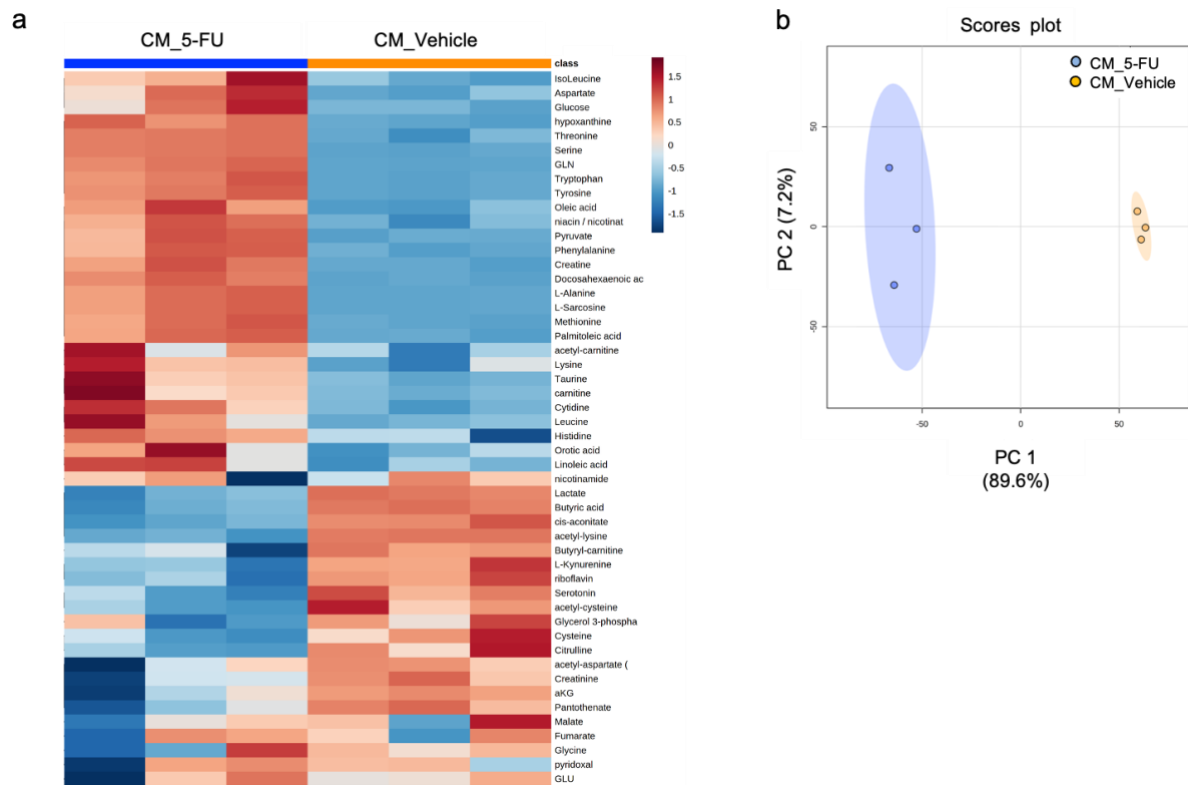

**Figure S11 Metabolite analyses of 5-FU treated conditioned media of LoVo**

(a) Metabolomics profile of 5-FU treated conditioned media (CM\_5-FU, blue) of LoVo compared to DMSO vehicle treated conditioned media (CM\_Vehicle, orange), presented as a heatmap visualization and hierarchical clustering analysis. Rows are metabolites and columns are samples from 3 independent experiments (n=3). The color key indicates the metabolite expression value (blue, lowest; red, highest). (b) Principal component analysis (PCA) plotting showing clusters of samples based on their similarity. Statistical significance was calculated using a one-way ANOVA followed by Student's t-test ( $p < 0.05$ ).

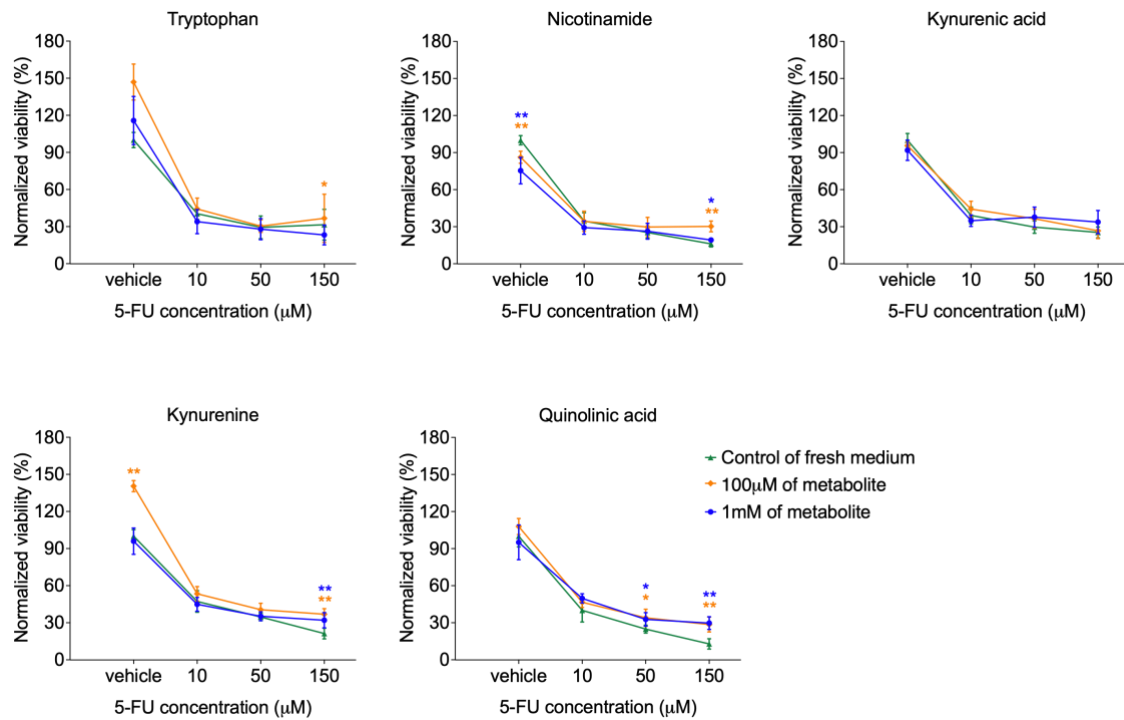

**Figure S12 Drug resistance effect of metabolites in the kynurenine pathway on SW620**

CMS4 cells were treated with either 100 μM or 1 mM of metabolite, and were exposed to different concentrations of 5-FU for 3 days. Cells treated with media only was taken as a control. Cell viability was measured using MTS assays. The squares, circles and triangles represent the average viability normalized to the control and the error bars represent the standard deviation (n=3). Statistical significance was calculated using a one-way ANOVA followed by Student's t-test. P-values of less than 0.05 and 0.01 were considered significant (\*) and highly significant (\*\*), respectively, when compared to the control.

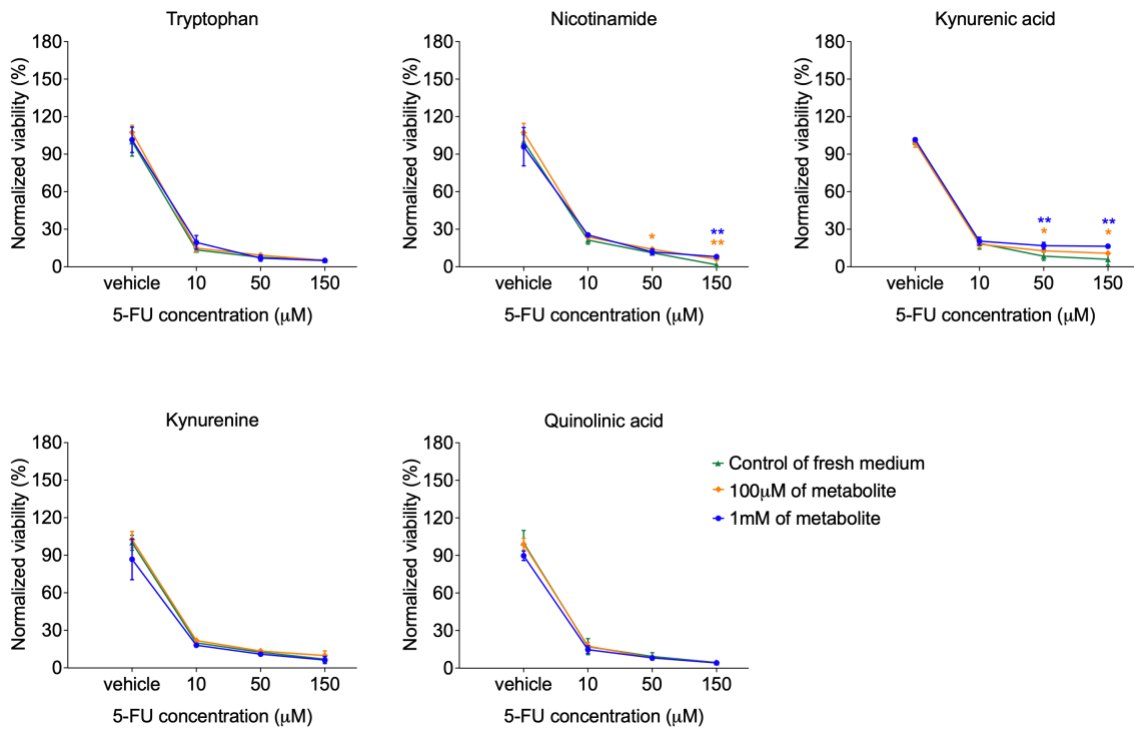

**Figure S13 Drug resistance effect of metabolites in the kynurenine pathway on MDST8**

CMS4 cells were treated with either 100 μM or 1 mM of metabolite, and were exposed to different concentrations of 5-FU for 3 days. Cells treated with media only was taken as a control. Cell viability was measured using MTS assays. The squares, circles and triangles represent the average viability normalized to the control and the error bars represent the standard deviation (n=3). Statistical significance was calculated using a one-way ANOVA followed by Student's t-test. P-values of less than 0.05 and 0.01 were considered significant (\*) and highly significant (\*\*), respectively, when compared to the control.
