# Supplementary material for: Intratumor heterogeneity and cell secretome promote chemotherapy resistance and progression of colorectal cancer
Source: PubMed Central journal article supplement (PMC10160076; doi:10.1038/s41419-023-05806-z), 2023-05-05
Supplement: 41419_2023_5806_MOESM2_ESM.pdf [file 41419_2023_5806_MOESM2_ESM.pdf]

| Metabolite                 | CAS        | KEGG   |
|----------------------------|------------|--------|
| 3-hydroxybutyric acid      | 300-85-6   | C01089 |
| 5-Hydroxylysine            |            |        |
| Acetyl CoA                 |            | C00024 |
| N-Acetyl-L-aspartic acid   | 997-55-7   |        |
| acetyl-carnitine           | 3040-38-8  | C02571 |
| Acetylcholine              | 51-84-3    | C01996 |
| Acetylcysteine             | 616-91-1   | C06809 |
| N-Acetylglutamine          |            |        |
| N6-Acetyl-L-lysine         |            |        |
| Adenine                    | 73-24-5    | C00147 |
| Adenosine                  | 58-61-7    | C00212 |
| ADP                        | 58-64-0    | C00008 |
| alpha-Ketoglutaric acid    | 328-50-7   | C00026 |
| Amino adipate              | 542-32-5   | C00956 |
| AMP                        | 61-19-8    | C00020 |
| Arachidonic acid           | 506-32-1   | C00219 |
| Arginine                   | 74-79-3    | C00062 |
| Argininosuccinate          | 2387-71-5  | C03406 |
| Asparagine                 | 70-47-3    | C00152 |
| Aspartate                  | 56-84-8    | C00049 |
| ATP                        | 56-65-5    | C00002 |
| beta Alanine               | 107-95-9   | C00099 |
| Betaine                    | 107-43-7   | C00719 |
| Butyric acid               | 107-92-6   | C00246 |
| Butyrylcarnitine           |            | C02862 |
| Caprylic acid              | 124-07-2   | C06423 |
| Carnitine                  | 541-15-1   | C00318 |
| Carnosine                  | 305-84-0   | C00386 |
| CDP                        | 63-38-7    | C00112 |
| Choline                    | 62-49-7    | C00114 |
| cis-aconitate              | 585-84-2   | C00417 |
| Citrate                    | 77-92-9    | C00158 |
| Citrulline                 | 372-75-8   | C00327 |
| CMP                        | 63-37-6    | C00055 |
| Coenzyme A                 | 85-61-0    | C00010 |
| Creatine                   | 57-00-1    | C00300 |
| Creatinine                 | 60-27-5    | C00791 |
| CTP                        | 65-47-4    | C00063 |
| Cystathionine              | 56-88-2    | C02291 |
| Cystine                    | 56-89-3    | C00491 |
| Cytidine                   | 65-46-3    | C00475 |
| Decanoic acid              | 172,2646   | C01571 |
| Decanoylcarnitine          | 1492-27-9  |        |
| Dihydroxyacetone phosphate | 57-04-5    | C00111 |
| Docosaehaenoic acid        | 6217-54-5  | C06429 |
| dodecanoic acid            | 143-07-7   | C02679 |
| Dodecanoylcarnitine        | 25518-54-1 |        |
| Eicosapentaenoic acid      | 10417-94-4 |        |
| ethanolamine phosphate     | 1071-23-4  | C00346 |
| FAD                        | 146-14-5   | C00016 |

|                              |            |        |
|------------------------------|------------|--------|
| Folate                       | 59-30-3    | C00504 |
| fructose 1,6-diphosphate     | 488-69-7   | C00354 |
| Fumarate                     | 110-17-8   | C00122 |
| GDP                          | 146-91-8   | C00035 |
| Glutamine                    | 56-85-9    | C00064 |
| Glutamate                    | 6893-26-1  | C00217 |
| Glucose                      | 50-99-7    | C00031 |
| Glucose-6-phosphate          | 56-73-5    | C00092 |
| D-Glyceraldehyde 3-phosphate | 142-10-9   | C00661 |
| Glycerol 3-phosphate         | 57-03-4    | C00093 |
| Glycine                      | 56-40-6    | C00037 |
| GMP                          | 85-32-5    | C00144 |
| GSH                          | 70-18-8    | C00051 |
| GSSG                         | 27025-41-8 | C00127 |
| GTP                          | 86-01-1    | C00044 |
| Guanine                      | 73-40-5    | C00242 |
| Guanosine                    | 118-00-3   | C00387 |
| Hexanoic acid                | 142-62-1   | C01585 |
| Hexanoyl-L-carnitine         | 6418-78-6  |        |
| Histidine                    | 71-00-1    | C00135 |
| Homocysteine                 | 6027-13-0  | C00155 |
| Hydroxy-L-proline            | 51-35-4    | C01157 |
| Hypoxanthine                 | 68-94-0    | C00262 |
| IMP                          | 131-99-7   | C00130 |
| Inosine                      | 58-63-9    | C00294 |
| IsoLeucine                   | 73-32-5    | C00407 |
| Lactate                      | 79-33-4    | C00186 |
| L-Alanine                    | 56-41-7    | C00041 |
| L-alpha-Amino-N-butyric acid | 1492-24-6  | C02356 |
| L-beta-Aminoisobutyric acid  | 4249-19-8  | C03284 |
| Leucine                      | 61-90-5    | C00123 |
| Linoleic acid                | 60-33-3    | C01595 |
| Linolenic acid               | 463-40-1   | C06427 |
| L-Sarcosine                  | 107-97-1   | C00213 |
| Lysine                       | 56-87-1    | C00047 |
| Malate                       | 97-67-6    | C00149 |
| Methionine                   | 63-68-3    | C00073 |
| N(6)-Methyllysine            | 1188-07-4  | C02728 |
| 1-Methylhistidine            | 368-16-1   | C01152 |
| Myristic acid                | 544-63-8   | C06424 |
| Myristoylcarnitine           | 25597-07-3 |        |
| NAD+                         | 53-84-9    | C00003 |
| NADH                         | 58-68-4    | C00004 |
| NADP+                        | 53-59-8    | C00006 |
| NADPH                        | 53-57-6    | C00005 |
| Nicotinate                   | 59-67-6    | C00253 |
| Nicotinamide                 | 98-92-0    | C00153 |
| Nicotinamide N-oxide         | 1986-81-8  |        |
| L-Octanoylcarnitine          | 25243-95-2 | C02838 |
| Oleic acid                   | 112-80-1   | C00712 |
| O-Phosphoethanolamine        | 1071-23-4  | C00346 |
| O-Phospho-L-serine           | 17885-08-4 | C01005 |

|                             |            |        |
|-----------------------------|------------|--------|
| Ornithine                   | 70-26-8    | C00077 |
| Oxoadipate                  | 3184-35-8  | C00322 |
| Oxypurinol                  | 2465-59-0  | C07599 |
| Palmitic acid               | 57-10-3    | C00249 |
| Palmitoleic acid            | 373-49-9   | C08362 |
| Palmitoylcarnitine          | 2364-67-2  | C02990 |
| Pantothenate                | 79-83-4    | C00864 |
| 2-phosphoenolpyruvate       | 138-08-9   | C00074 |
| Phenol red                  | 143-74-8   |        |
| Phenylalanine               | 63-91-2    | C00079 |
| Phosphocreatine             | 67-07-2    | C02305 |
| picolinate                  |            |        |
| Proline                     | 147-85-3   | C00148 |
| Propionyl-carnitine         | 17298-37-2 | C03017 |
| pyridoxal                   |            |        |
| Pyruvate                    | 127-17-3   | C00022 |
| Riboflavin                  | 83-88-5    | C00255 |
| Ribose                      | 50-69-1    | C00121 |
| Ribose 1-phosphate          | 14075-00-4 | C00620 |
| S-Adenosyl-L-Homocysteine   | 979-92-0   | C00021 |
| S-Adenosyl-L-methionine     | 29908-03-0 | C00019 |
| D-Sedoheptulose 7-phosphate | 2646-35-7  | C05382 |
| Serine                      | 56-45-1    | C00065 |
| Stearic acid                | 57-11-4    | C01530 |
| Succinic acid               | 110-15-6   | C00042 |
| S-Cysteinossuccinic acid    |            |        |
| S-succinylglutathione       |            |        |
| Taurine                     | 107-35-7   | C00245 |
| Thiamine                    |            |        |
| Threonine                   | 72-19-5    | C00188 |
| Thymidine                   |            |        |
| Tryptophan                  | 73-22-3    | C00078 |
| Tyrosine                    | 60-18-4    | C00082 |
| UDP                         | 58-98-0    | C00015 |
| UDP-GlcNAc                  | 528-04-1   | C00043 |
| UMP                         | 58-97-9    | C00105 |
| Urate                       | 69-93-2    | C00366 |
| Uridine                     | 58-96-8    | C00299 |
| Uridine diphosphate glucose | 133-89-1   | C00029 |
| UTP                         | 63-39-8    | C00075 |
| Valine                      | 72-18-4    | C00183 |
| Xanthine                    | 69-89-6    | C00385 |
| Xanthosine                  |            |        |
| Xanthylic acid              |            |        |
